# Supplementary material for: Ameliorating Effects of Coriander on Gastrocnemius Muscles Undergoing Precachexia in a Rat Model of Rheumatoid Arthritis: A Proteomics Analysis
Source: MDPI journal article supplement (doi:10.3390/nu13114041), 2021-11-12
Supplement: s1 [file s1]

### **Supplementary Figure Legend**

**Figure S1:** KEGG graph of “citrate cycle (TCA cycle)” with DEP identified in comparison RA/CON (left part) and COR/RA (right part). Fold change information is indicated in colors from low (green) to high (red).

**Figure S2:** KEGG graph of “glycolysis/gluconeogenesis” with DEP identified in comparison RA/CON (left part) and COR/RA (right part). Fold change information is indicated in colors from low (green) to high (red).

**Figure S3:** KEGG graph of “oxidative phosphorylation” with DEP identified in comparison RA/CON (left part) and COR/RA (right part). Fold change information is indicated in colors from low (green) to high (red).

Figure S1

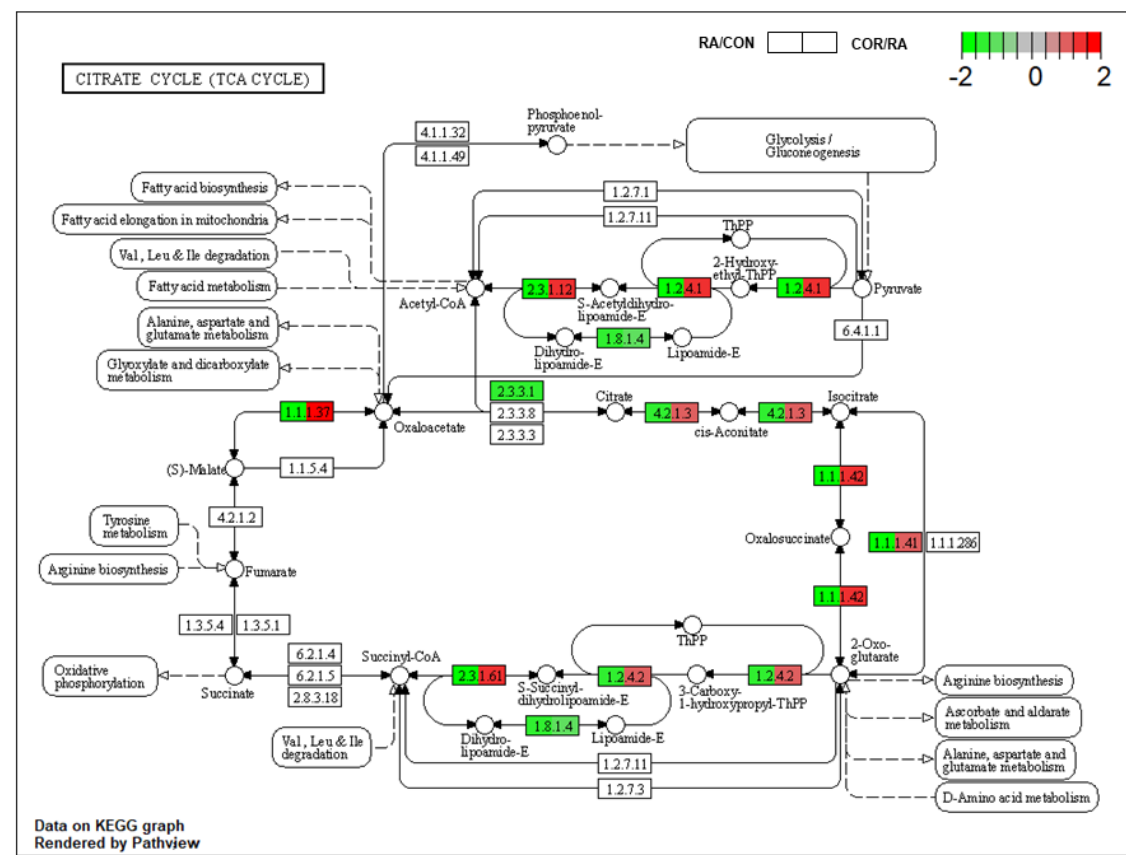

**Figure S2**

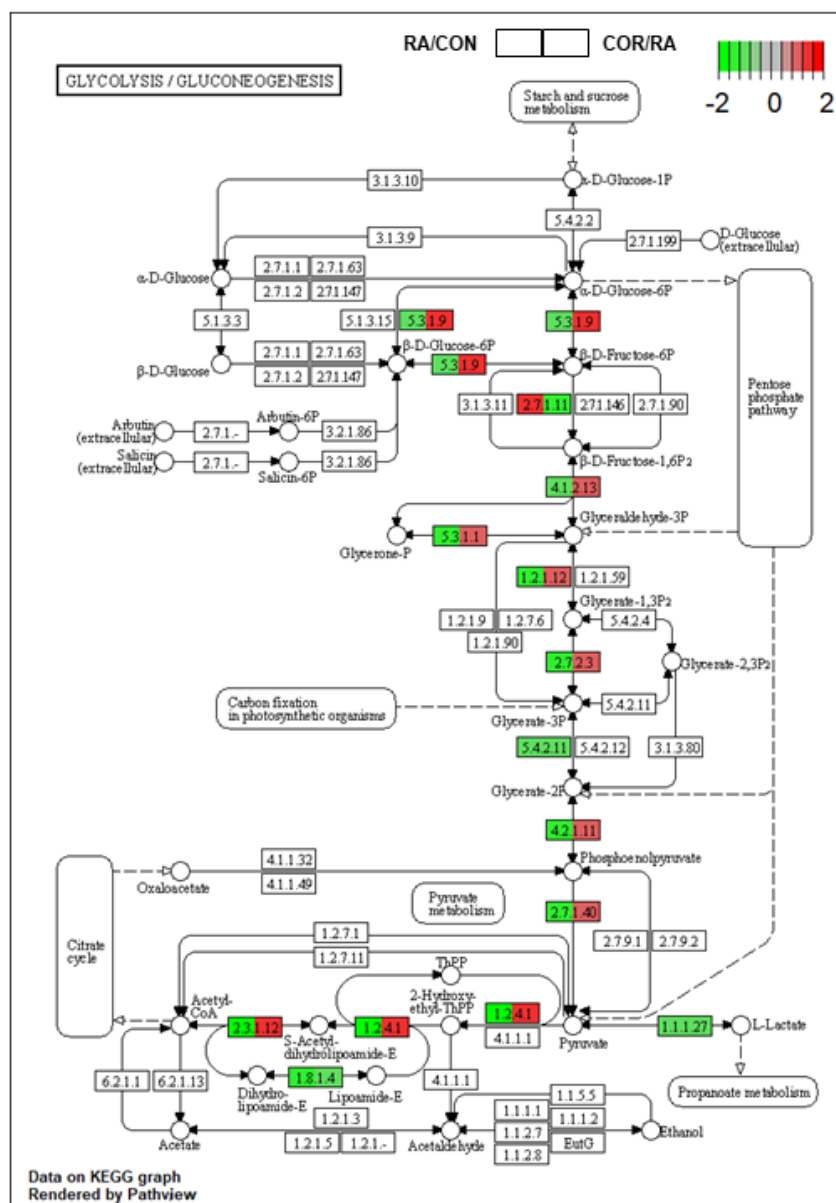

### Figure S3

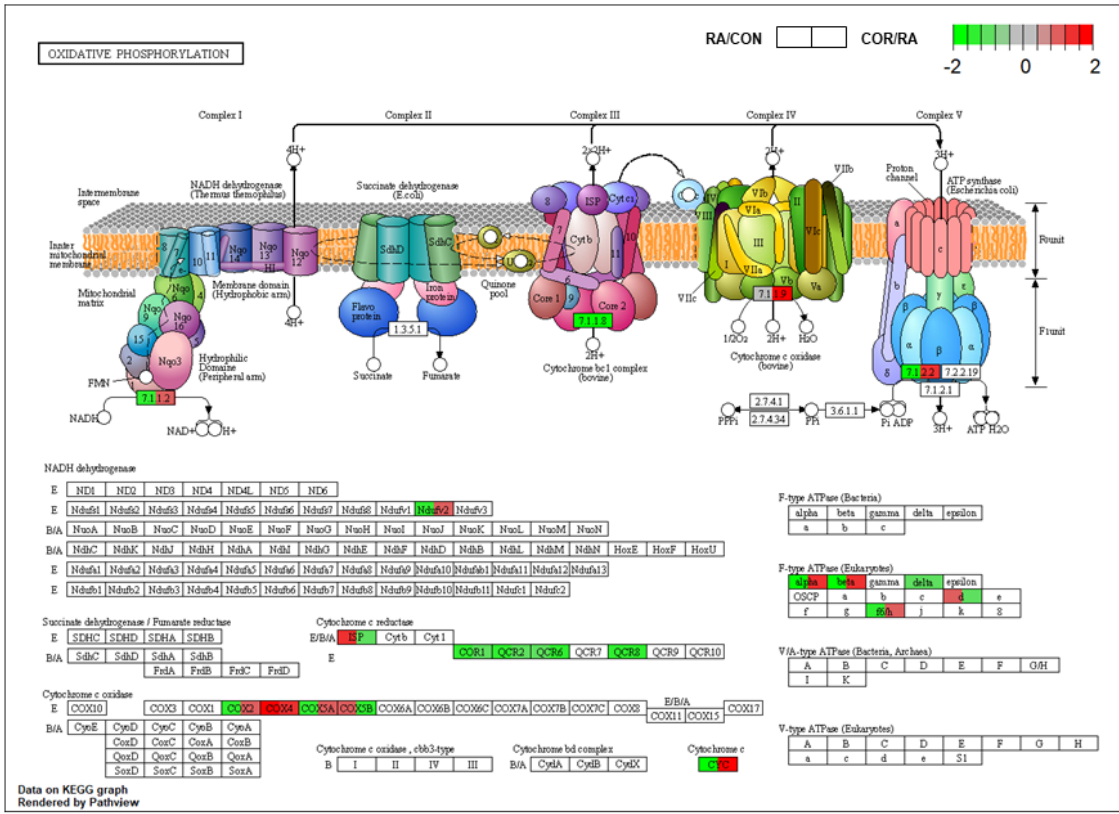

**Table S1.** Composition of experimental diets

| Ingredient               | AIN-93G         | COR diet |
|--------------------------|-----------------|----------|
|                          | diet<br>(% w/w) | (% w/w)  |
| Cornstarch               | 39.7            | 37.7     |
| Casein                   | 20              | 20       |
| Dextrinized cornstarch   | 13.2            | 13.2     |
| Sucrose                  | 10.3            | 10.3     |
| Soybean oil              | 7               | 7        |
| Fiber                    | 5               | 5        |
| Mineral mix (AIN 93G-MX) | 3.5             | 3.5      |
| Vitamin mix (AIN 93G-MX) | 1               | 1        |
| L-Cystine                | 0.3             | 0.3      |
| Coriander                | 0               | 2        |
| Eggshell membrane        | 0               | 0        |
